# Supplementary material for: LiDAR Reveals the Process of Vision-Mediated Predator–Prey Relationships
Source: MDPI journal article supplement (doi:10.3390/rs14153730), 2022-08-04
Supplement: s1 [file s1]

**Table S1. Locations of wild boar nests.** We randomly selected 20 out of 241 wild boar nests to collect environmental point cloud data.

| Number | Sample              | Latitude | Longitude  |
|--------|---------------------|----------|------------|
| 1      | 2021-04-23-12-10-28 | 42.9452  | 131.126132 |
| 2      | 2021-04-23-15-12-35 | 42.95173 | 131.12774  |
| 3      | 2021-04-25-10-29-46 | 43.22705 | 131.052397 |
| 4      | 2021-04-25-14-57-31 | 43.21385 | 131.04208  |
| 5      | 2021-04-26-14-17-33 | 42.98792 | 130.979705 |
| 6      | 2021-04-27-09-27-28 | 42.88134 | 130.858783 |
| 7      | 2021-04-27-13-22-13 | 43.12135 | 131.12092  |
| 8      | 2021-04-29-15-06-49 | 42.91438 | 131.00002  |
| 9      | 2021-05-09-13-23-16 | 42.88071 | 130.589645 |
| 10     | 2021-05-10-09-24-52 | 43.14933 | 130.770765 |
| 11     | 2021-05-10-10-42-41 | 43.04908 | 130.769783 |
| 12     | 2021-05-11-10-51-08 | 43.28988 | 131.214488 |
| 13     | 2021-05-15-12-01-07 | 43.33613 | 131.219142 |
| 14     | 2021-05-16-10-22-25 | 43.14541 | 131.16642  |
| 15     | 2021-05-17-11-08-33 | 43.42755 | 131.11578  |
| 16     | 2021-05-18-12-01-28 | 43.39257 | 131.179027 |
| 17     | 2021-05-19-09-47-40 | 43.36409 | 131.120197 |
| 18     | 2021-05-26-12-45-26 | 43.15732 | 130.918598 |
| 19     | 2021-05-28-13-13-54 | 43.2271  | 130.797055 |
| 20     | 2021-05-29-12-16-10 | 43.23155 | 130.955195 |

**Table S2. The coordinates of the center point.** The cartesian coordinate system was independently constructed for each sample, and the position of the nest in the corresponding sample was transformed into the form of (x, y, z). This transformation is beneficial to the orderly processing of the point cloud data.

| Number | Sample              | x       | y       | z |
|--------|---------------------|---------|---------|---|
| 1      | 2021-04-23-12-10-28 | -0.62   | 1.9849  | 0 |
| 2      | 2021-04-23-15-12-35 | -1.5481 | -0.2292 | 0 |
| 3      | 2021-04-25-10-29-46 | 0.1488  | 1.9407  | 0 |
| 4      | 2021-04-25-14-57-31 | -2.2982 | -2.0417 | 0 |
| 5      | 2021-04-26-14-17-33 | -0.9897 | -1.0452 | 0 |
| 6      | 2021-04-27-09-27-28 | -2.786  | -0.0692 | 0 |
| 7      | 2021-04-27-13-22-13 | -1.1993 | 0.4729  | 0 |
| 8      | 2021-04-29-15-06-49 | -0.9184 | 1.0576  | 0 |
| 9      | 2021-05-09-13-23-16 | -1.2305 | 0.2088  | 0 |

|    |                     |         |         |   |
|----|---------------------|---------|---------|---|
| 10 | 2021-05-10-09-24-52 | -1.2534 | -0.3684 | 0 |
| 11 | 2021-05-10-10-42-41 | -0.0114 | 1.2837  | 0 |
| 12 | 2021-05-11-10-51-08 | -0.9848 | -0.4515 | 0 |
| 13 | 2021-05-15-12-01-07 | 0.4978  | 1.5822  | 0 |
| 14 | 2021-05-16-10-22-25 | 0.1059  | 1.3791  | 0 |
| 15 | 2021-05-17-11-08-33 | -0.8445 | 1.4189  | 0 |
| 16 | 2021-05-18-12-01-28 | 0.5956  | 1.1501  | 0 |
| 17 | 2021-05-19-09-47-40 | 0.0619  | 0.9523  | 0 |
| 18 | 2021-05-26-12-45-26 | 0.3513  | 0.8418  | 0 |
| 19 | 2021-05-28-13-13-54 | -0.3107 | 1.5419  | 0 |
| 20 | 2021-05-29-12-16-10 | -0.343  | 1.1519  | 0 |

**Table S7. In the standing behaviors scene (h = 1 m), the tiger's visibility changes with the distance and the rate of change of the visibility.** The curve equation represents the relationship between visibility change and distance change in each sample, and the derivative function represents the relationship between visibility change rate and distance change.

| Number | Sample              | Curve equation     | R <sup>2</sup> | P-value | Derived function |
|--------|---------------------|--------------------|----------------|---------|------------------|
| 1      | 2021-04-23-12-10-28 | 1.079-0.257*log(x) | 0.848          | ***     | -(0.257 * (1/x)) |
| 2      | 2020-04-23-15-12-35 | 1.042-0.216*log(x) | 0.789          | ***     | -(0.216 * (1/x)) |
| 3      | 2021-04-25-10-29-46 | 1.086-0.274*log(x) | 0.892          | ***     | -(0.274 * (1/x)) |
| 4      | 2021-04-25-14-57-31 | 1.092-0.237*log(x) | 0.826          | ***     | -(0.237 * (1/x)) |
| 5      | 2021-04-26-14-17-33 | 1.055-0.293*log(x) | 0.864          | ***     | -(0.293 * (1/x)) |
| 6      | 2021-04-27-09-27-28 | 1.056-0.265*log(x) | 0.9            | ***     | -(0.265 * (1/x)) |
| 7      | 2021-04-27-13-22-13 | 1-0.209*log(x)     | 0.818          | ***     | -(0.209 * (1/x)) |
| 8      | 2021-04-29-15-06-49 | 1.103-0.263*log(x) | 0.877          | ***     | -(0.263 * (1/x)) |
| 9      | 2021-05-09-13-23-16 | 1.059-0.213*log(x) | 0.862          | ***     | -(0.213 * (1/x)) |
| 10     | 2021-05-10-09-24-52 | 1.027-0.219*log(x) | 0.808          | ***     | -(0.219 * (1/x)) |
| 11     | 2021-05-10-10-42-41 | 1.009-0.219*log(x) | 0.787          | ***     | -(0.219 * (1/x)) |
| 12     | 2021-05-11-10-51-08 | 1.076-0.275*log(x) | 0.909          | ***     | -(0.275 * (1/x)) |
| 13     | 2021-05-15-12-01-07 | 0.965-0.187*log(x) | 0.753          | ***     | -(0.187 * (1/x)) |
| 14     | 2021-05-16-10-22-25 | 1.079-0.214*log(x) | 0.894          | ***     | -(0.214 * (1/x)) |
| 15     | 2021-05-17-11-08-33 | 1.084-0.297*log(x) | 0.852          | ***     | -(0.297 * (1/x)) |
| 16     | 2021-05-18-12-01-28 | 0.876-0.224*log(x) | 0.885          | ***     | -(0.224 * (1/x)) |
| 17     | 2021-05-19-09-47-40 | 0.992-0.269*log(x) | 0.928          | ***     | -(0.269 * (1/x)) |
| 18     | 2021-05-26-12-45-26 | 1.064-0.236*log(x) | 0.853          | ***     | -(0.236 * (1/x)) |
| 19     | 2021-05-28-13-13-54 | 0.956-0.225*log(x) | 0.851          | ***     | -(0.225 * (1/x)) |
| 20     | 2021-05-29-12-16-10 | 1.040-0.221*log(x) | 0.884          | ***     | -(0.221 * (1/x)) |

**Table S8. In the ambush behavior scene (h = 0.5 m), the tiger's visibility changes with distance changes, and the rate of change of the visibility.** The curve equation represents the relationship between visibility change and distance change in each sample, and the derivative function represents the relationship between visibility change rate and distance change.

| Number | Sample              | Curve equation     | R <sup>2</sup> | P-value | Derived function |
|--------|---------------------|--------------------|----------------|---------|------------------|
| 1      | 2021-04-23-12-10-28 | 0.971-0.248*log(x) | 0.828          | ***     | -(0.248 * (1/x)) |
| 2      | 2021-04-23-15-12-35 | 1.008-0.279*log(x) | 0.91           | ***     | -(0.279 * (1/x)) |
| 3      | 2021-04-25-10-29-46 | 0.983-0.285*log(x) | 0.951          | ***     | -(0.285 * (1/x)) |
| 4      | 2021-04-25-14-57-31 | 0.998-0.265*log(x) | 0.909          | ***     | -(0.265 * (1/x)) |
| 5      | 2021-04-26-14-17-33 | 0.933-0.298*log(x) | 0.916          | ***     | -(0.298 * (1/x)) |
| 6      | 2021-04-27-09-27-28 | 0.955-0.281*log(x) | 0.943          | ***     | -(0.281 * (1/x)) |
| 7      | 2021-04-27-13-22-13 | 0.926-0.247*log(x) | 0.846          | ***     | -(0.247 * (1/x)) |
| 8      | 2021-04-29-15-06-49 | 1.104-0.309*log(x) | 0.883          | ***     | -(0.309 * (1/x)) |
| 9      | 2021-05-09-13-23-16 | 0.954-0.214*log(x) | 0.904          | ***     | -(0.214 * (1/x)) |
| 10     | 2021-05-10-09-24-52 | 0.900-0.247*log(x) | 0.88           | ***     | -(0.247 * (1/x)) |
| 11     | 2021-05-10-10-42-41 | 0.918-0.232*log(x) | 0.884          | ***     | -(0.232 * (1/x)) |
| 12     | 2021-05-11-10-51-08 | 1.063-0.289*log(x) | 0.919          | ***     | -(0.289 * (1/x)) |
| 13     | 2021-05-15-12-01-07 | 0.868-0.244*log(x) | 0.857          | ***     | -(0.244 * (1/x)) |
| 14     | 2021-05-16-10-22-25 | 1.026-0.246*log(x) | 0.948          | ***     | -(0.246 * (1/x)) |
| 15     | 2021-05-17-11-08-33 | 1.112-0.341*log(x) | 0.86           | ***     | -(0.341 * (1/x)) |
| 16     | 2021-05-18-12-01-28 | 0.838-0.249*log(x) | 0.917          | ***     | -(0.249 * (1/x)) |
| 17     | 2021-05-19-09-47-40 | 0.913-0.284*log(x) | 0.922          | ***     | -(0.284 * (1/x)) |
| 18     | 2021-05-26-12-45-26 | 0.978-0.252*log(x) | 0.821          | ***     | -(0.252 * (1/x)) |
| 19     | 2021-05-28-13-13-54 | 0.892-0.241*log(x) | 0.876          | ***     | -(0.241 * (1/x)) |
| 20     | 2021-05-29-12-16-10 | 0.968-0.254*log(x) | 0.918          | ***     | -(0.254 * (1/x)) |

**Table S10. Range of point clouds used to project to the corresponding minimum enclosing rectangle.** In Cartesian coordinates, different quadrants correspond to different formulas due to changes in direction ( $\theta$ ).

| Value of direction ( $\theta$ ) | The expression for line x1     | The expression for line x2                      | The expression for line y1                              | The expression for line y2                              |
|---------------------------------|--------------------------------|-------------------------------------------------|---------------------------------------------------------|---------------------------------------------------------|
| $0 < \theta < 90$               | $x1 = \frac{y}{-\tan(\theta)}$ | $x2 = \frac{y - D/\cos(\theta)}{-\tan(\theta)}$ | $y1 = \tan(90 - \theta) * x - \frac{w/2}{\sin(\theta)}$ | $y2 = \tan(90 - \theta) * x + \frac{w/2}{\sin(\theta)}$ |
| $\theta = 90$                   | $x1 = 0$                       | $x2 = D$                                        | $y1 = -\frac{w}{2}$                                     | $y2 = \frac{w}{2}$                                      |

|           |                                                             |                    |                                                                  |                                                                       |
|-----------|-------------------------------------------------------------|--------------------|------------------------------------------------------------------|-----------------------------------------------------------------------|
| 90<θ<180  | $x1 = \frac{y}{\tan(180 - \theta)}$                         |                    | $y1$                                                             | $y2$                                                                  |
|           | $x2 = \frac{y + D/\cos(180 - \theta)}{\tan(180 - \theta)}$  |                    | $= -\tan(\theta - 90) * x$<br>$-\frac{w/2}{\sin(180 - \theta)}$  | $= -\tan(\theta - 90)$<br>$* x$<br>$+\frac{w/2}{\sin(180 - \theta)}$  |
| θ=180     | $x1 = -\frac{w}{2}$                                         | $x2 = \frac{w}{2}$ | $y1 = 0$                                                         | $y2 = -D$                                                             |
| 180<θ<270 | $x1 = \frac{y + D/\cos(\theta - 180)}{-\tan(\theta - 180)}$ |                    | $y1$                                                             | $y2$                                                                  |
|           | $x2 = \frac{y}{-\tan(\theta - 180)}$                        |                    | $= \tan(270 - \theta) * x$<br>$-\frac{w/2}{\cos(270 - \theta)}$  | $= \tan(270 - \theta)$<br>$* x$<br>$+\frac{w/2}{\cos(270 - \theta)}$  |
| θ=270     | $x1 = 0$                                                    | $x2 = -D$          | $y1 = -\frac{w}{2}$                                              | $y2 = \frac{w}{2}$                                                    |
| 270<θ<360 | $x1 = \frac{y - D/\cos(360 - \theta)}{\tan(360 - \theta)}$  |                    | $y1$                                                             | $y2$                                                                  |
|           | $x2 = \frac{y}{\tan(360 - \theta)}$                         |                    | $= -\tan(360 - \theta) * x$<br>$-\frac{w/2}{\sin(360 - \theta)}$ | $= -\tan(360 - \theta)$<br>$* x$<br>$+\frac{w/2}{\sin(360 - \theta)}$ |
| θ=360     | $x1 = -\frac{w}{2}$                                         | $x2 = \frac{w}{2}$ | $y1 = 0$                                                         | $y2 = D$                                                              |
